# Supplementary material for: AttentionFire_v1.0: interpretable machine learning fire model for burned area predictions over tropics
Source: Copernicus journal article supplement (doi:10.5194/gmd-2022-195), 2022-08-11
Supplement: Supplementary file 1 [file gmd-2022-195-supplement.pdf]

1 **Supplementary Information**

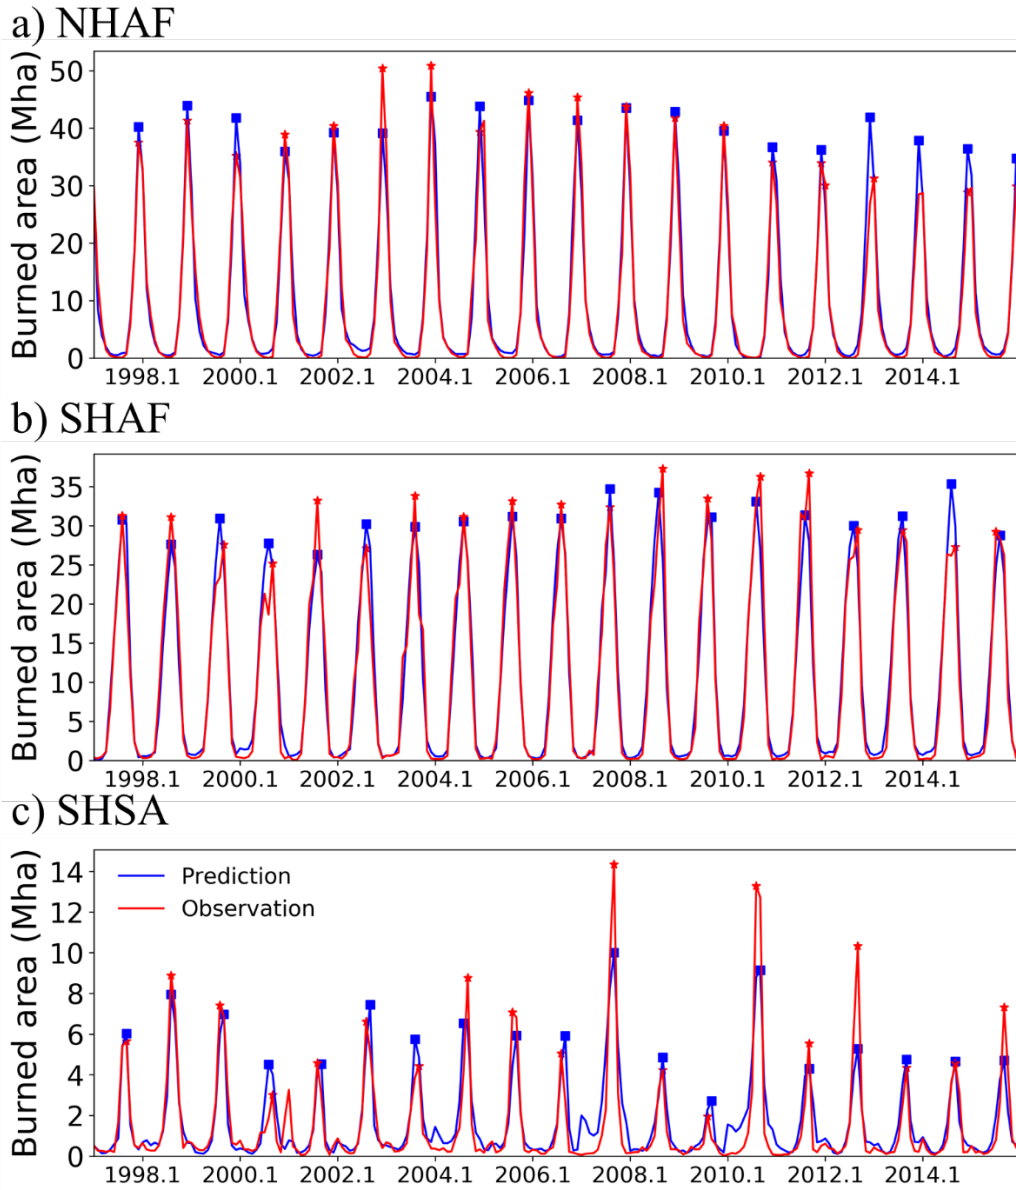

3 **Fig. S1:** Observed and AttentionFire modeled monthly total burned areas in NHAF,  
4 SHAF, and SHSA regions from 1997-2015. Peak fire month in each year and its  
5 corresponding burned areas are marked with red star (observations) and blue square  
6 (AttentionFire) markers.

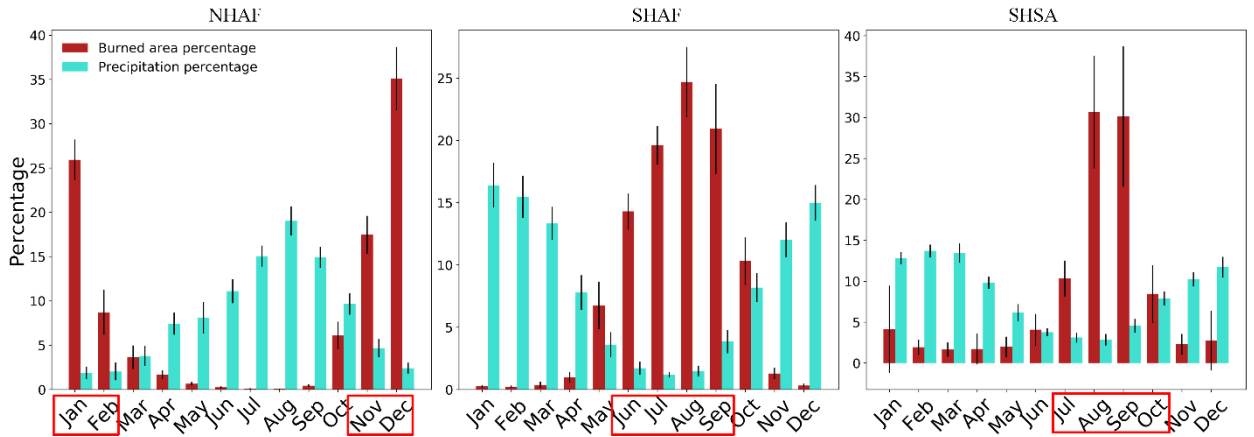

7  
 8 **Fig. S2:** Monthly mean precipitation and burned area percentage of yearly total amount.  
 9 The months with top four largest burned areas are defined as the fire season (red box).  
 10 Fire season accounts for 87.2%, 79.5%, and 79.6% of yearly total burned areas over  
 11 NHAf, SHAF, and SHSA, respectively.

12  
 13

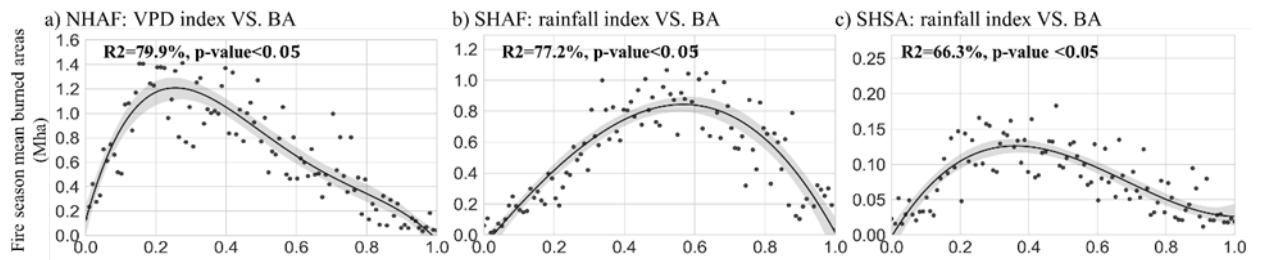

14  
 15 **Fig. S3:** Dependency between fire season mean burned area and rainfall or VPD scalars  
 16 (standardized) in NHAf, SHAF, and SHSA regions. The x-axis is the weighted sum of  
 17 each driving variable across time. The weight of each month is the calculated mean  
 18 temporal attention weight of the driver at the corresponding month. The x-axis is evenly  
 19 divided into 100 bins according to the range of weighted sum rainfall or VPD of  
 20 different grids in each studied region and normalized to the range from 0 to 1. The fire  
 21 season mean burned area in each bin is calculated. Each point in the figure represents  
 22 the fire season mean burned area in the corresponding rainfall or VPD bin. The  
 23 coefficient of determination ( $R^2$ ) is the explained variance of polynomial fitted fire  
 24 season mean burned areas and observations.

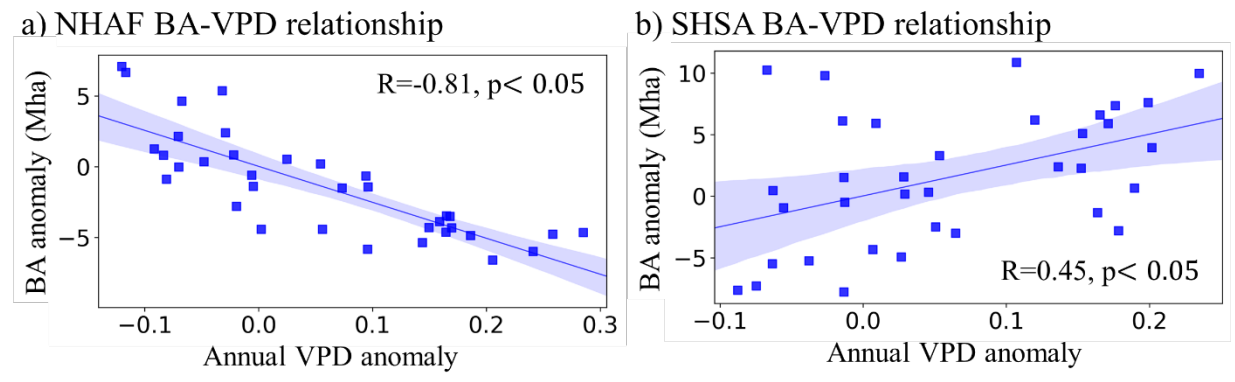

25

26 **Fig. S4.** Regression relationship between Burned area changes and vapor pressure  
27 deficit changes.  
28

29 **Table S1. Model Hyperparameter settings**

| Model                                  | Hyperparameter settings                                                                                                                                                                                                                                                                         |
|----------------------------------------|-------------------------------------------------------------------------------------------------------------------------------------------------------------------------------------------------------------------------------------------------------------------------------------------------|
| Random Forest                          | Minimum leaf sample: [3,6,9]<br>Number of trees: [20,30,40]                                                                                                                                                                                                                                     |
| Decision Tree                          | Minimum leaf sample: [3,6,9]<br>Maximum depth: 150                                                                                                                                                                                                                                              |
| Gradient Boosting Decision Tree (GBDT) | Learning rate: 0.01<br>Maximum depth: [3,4,5]<br>Number of trees: 100                                                                                                                                                                                                                           |
| ANN                                    | Maximum iteration: 2,000<br>Number of neuros in hidden layers: [30,10]<br>Batch size: 32<br>Activation: RELU<br>Optimizer: SGD                                                                                                                                                                  |
| LSTM                                   | Dimension of hidden state vector: [8, 12, 16]<br>Learning rate: initial value 0.01, and update by multiplying 0.8 each step.<br>Batch size: 32<br>Optimizer: Adam with weight decay rate [ $10^{-3}$ , $10^{-4}$ , $5 \times 10^{-4}$ , $10^{-5}$ ]<br>Sequence length: 12<br>Dropout rate: 0.1 |
| AttentionFire                          | Dimension of hidden state vector: [8, 12, 16]<br>Learning rate: initial value 0.01, and update by multiplying 0.8 each step.<br>Batch size: 32<br>Optimizer: Adam with weight decay rate [ $10^{-3}$ , $10^{-4}$ , $5 \times 10^{-4}$ , $10^{-5}$ ]<br>Sequence length: 12<br>Dropout rate: 0.1 |

30

31 **Table S2. Datasets**

32

| Variables                       | dataset                                                                                                                                                                                                                                                                                                                                |
|---------------------------------|----------------------------------------------------------------------------------------------------------------------------------------------------------------------------------------------------------------------------------------------------------------------------------------------------------------------------------------|
| Burned Area                     | Global Fire Emissions Database <sup>4</sup> :<br><a href="https://daac.ornl.gov/VEGETATION/guides/fire_emissions_v4.html">https://daac.ornl.gov/VEGETATION/guides/fire_emissions_v4.html</a>                                                                                                                                           |
| Climate                         | Precipitation (RAIN), temperature (TSA), surface air pressure (PA), specific humidity (SH), downward short-wave radiation (SW), wind speed (WIND) from NCEP-DOE Reanalysis 2 <sup>4</sup> :<br><a href="https://psl.noaa.gov/data/gridded/data.ncep.reanalysis2.html">https://psl.noaa.gov/data/gridded/data.ncep.reanalysis2.html</a> |
| Fuel condition and availability | Fuel moisture, coarse wood debris, total vegetation biomass, litter biomass are from ELM prognostic simulations <sup>5</sup>                                                                                                                                                                                                           |
| Population                      | Population density <sup>6</sup>                                                                                                                                                                                                                                                                                                        |
| Road density                    | Global maps of road density <sup>7</sup>                                                                                                                                                                                                                                                                                               |
| Livestock                       | Global maps of livestock density <sup>8</sup>                                                                                                                                                                                                                                                                                          |
| Land cover                      | Bare soil, Forest and, Grass percentage are from LUH2 <sup>9</sup>                                                                                                                                                                                                                                                                     |
| VPD                             | Calculated based on air temperature, air pressure, and specific humidity <sup>10</sup>                                                                                                                                                                                                                                                 |
| Oceanic index                   | Niño Index (ONI), Atlantic multidecadal Oscillation (AMO) index, Tropical Northern Atlantic (TNA) Index, and Tropical Southern Atlantic (TSA) Index are from: <a href="https://psl.noaa.gov/data/climateindices/list/">https://psl.noaa.gov/data/climateindices/list/</a>                                                              |

33

34

35 **Table S3. Ranked top-five important variables for future burned area changes in**  
36 **NHAF and SHSA.**

| NHAF          |                     | SHAF        |                     | SHSA            |                     |
|---------------|---------------------|-------------|---------------------|-----------------|---------------------|
| Variable      | Importance on trend | Variable    | Importance on trend | Variable        | Importance on trend |
| VPD           | 0.17                | Population  | 0.35                | VPD             | 0.35                |
| Land cover    | 0.16                | Temperature | 0.16                | Temperature     | 0.16                |
| Temperature   | 0.11                | VPD         | 0.15                | Solar radiation | 0.10                |
| Population    | 0.10                | Radiation   | 0.02                | Precipitation   | 0.09                |
| Precipitation | 0.02                | Land cover  | 0.01                | Land cover      | 0.05                |

*Note:* A larger value in the table represents a more important variable for future burned area (BA) changes. To analyze interannual variations of a specific variable on future BA changes, firstly we iteratively surrogated the specific variable with its climatology while keeping the other variables the same; then we fed the new datasets into the model and reprojected the BA. We calculated the slope of BA trend in each grid of each region, and calculated the Pearson correlation coefficient (R) between the gridded slopes of predictions with raw datasets and surrogated datasets. If the coefficient R was larger, it means the surrogated variable was unimportant, therefore, we used 1-R (the value in the table) to show the importance of a specific variable on future BA changes (a larger value represents more important for future BA changes).

37

38 **References**

39

- 40 1 Chen, Y. *et al.* Forecasting fire season severity in South America using sea surface temperature  
41 anomalies. *Science* **334**, 787-791 (2011).
- 42 2 Yu, Y. *et al.* Quantifying the drivers and predictability of seasonal changes in African fire.  
43 *Nature communications* **11**, 1-8 (2020).
- 44 3 Giglio, L., Randerson, J. T. & Van Der Werf, G. R. Analysis of daily, monthly, and annual burned  
45 area using the fourth-generation global fire emissions database (GFED4). *Journal of*  
46 *Geophysical Research: Biogeosciences* **118**, 317-328 (2013).
- 47 4 Kanamitsu, M. *et al.* Ncep–doe amip-ii reanalysis (r-2). *Bulletin of the American Meteorological*  
48 *Society* **83**, 1631-1644 (2002).
- 49 5 Zhu, Q. *et al.* Representing nitrogen, phosphorus, and carbon interactions in the E3SM Land  
50 Model: Development and global benchmarking. *Journal of Advances in Modeling Earth*  
51 *Systems*, doi: 10.1029/2018MS001571 (2019).
- 52 6 Dobson, J. E., Bright, E. A., Coleman, P. R., Durfee, R. C. & Worley, B. A. LandScan: a global  
53 population database for estimating populations at risk. *Photogrammetric engineering and*  
54 *remote sensing* **66**, 849-857 (2000).
- 55 7 Meijer, J. R., Huijbregts, M. A., Schotten, K. C. & Schipper, A. M. Global patterns of current  
56 and future road infrastructure. *Environmental Research Letters* **13**, 064006 (2018).
- 57 8 Rothman-Ostrow, P., Gilbert, W. & Rushton, J. Tropical Livestock Units: Re-evaluating a  
58 Methodology. *Frontiers in Veterinary Science* **7**, 973 (2020).
- 59 9 Hurtt, G. C. *et al.* Harmonization of global land-use change and management for the period  
60 850–2100 (LUH2) for CMIP6. *Geoscientific Model Development Discussions*, 1-65 (2020).

61 10 Bolton, D. The computation of equivalent potential temperature. *Monthly weather review* **108**,  
62 1046-1053 (1980).

63

64
