# Supplementary material for: AttentionFire_v1.0: interpretable machine learning fire model for burned area predictions over tropics
Source: Copernicus journal article supplement (doi:10.5194/gmd-2022-195), 2022-08-11
Supplement: Supplementary file [file gmd-2022-195-AC1-supplement.pdf]

Dear Editor and anonymous reviewers,

Thank you for your review and valuable comments for helping us improve the manuscript. Submitted is the revised version with changes highlighted and we include responses (in blue color) to each comment and corresponding text modifications (in green color) in this document. In summary, we followed your suggestions and added more details, comprehensive experiments, analyses, and discussions. These new revisions mainly include:

- 1) We added more details about the machine learning models applied in wildfire, and analyzed and discussed their strengths, potential limitations, and their interpretability differences. We also provided codes for all six machine learning models at <https://zenodo.org/record/7416437#.Y5JnBXbMK5c> to further help readers understand those machine learning models.
- 2) We provided more information about the datasets and the model validation method;
- 3) We added more background about the ocean indices, and further analyzed their impacts on wildfires;
- 4) We included all available earth system models (ESMs) of CMIP6, and projected and analyzed future burned area changes in African and South American regions under both low (SSP126) and high (SSP585) emission scenarios.
- 5) We added more discussions about AttentionFire model, including its computational cost (memory and time consumption) and potential limitation, its application in other regions, the potential ways for narrowing future projection uncertainty, and the full coupling of AttentionFire into the ESMs.

Details of the revisions are provided in the following response letter and revised manuscript.

Thank you for considering our manuscript for publication with the journal and we look forward to hearing your decision.

Qing Zhu on the behalf of all coauthors

## Reviewer #1

The authors of “AttentionFire\_v1.0: interpretable machine learning fire model for burned area prediction over tropics” developed a novel machine learning model of fire for use in South America and Africa. They use the model to gain insight into the controls of wildfire on the landscape and make future predictions. Overall, this paper is interesting and provides insight into an important process and region of the world.

Thank you for the positive comments.

I have some major concerns, however, mostly related to the presentation of the methods that should be addressed to improve the clarity and rigor of the manuscript.

Thanks for all suggestions, we have added more details about the methods, data sets, validation method, future projections, and background for section 3.3. We also included more Earth System Models of CMIP6 and analyzed future burned area changes under low (SSP126) and high (SSP585) emission scenarios, respectively.

1. Adding more explanation about the model and how it related to other machine learning models in plain terms.

We added more explanation about the machine learning (ML) models and compared them (Table 1: RF, DT, GBDT, ANN, and LSTM) with the AttentionFire model. We explained why baseline ML models are less interpretable, the relationship between artificial neural network and LSTM, the strengths, potential limitations, and corresponding references for the ML models. We also discussed the interpretability differences between AttentionFire and other ML models. We revised Introduction, Methods, and Results and Discussions accordingly. Below are the revisions to the manuscript.

We added more details about the ML model interpretability, the black box nature of ML models, and the reasons why they are less interpretable. L111-122, section 1:

For example, the commonly used neural network or deep learning models (Zhu et al., 2022; Joshi and Sukumar, 2021) themselves are complex and built upon hidden neural layers with non-linear activation functions and thus cannot directly identify the relative importance of different drivers for wildfires (Murdoch et al., 2019; Jain et al., 2020). A few ML models (e.g., decision tree and random forest) provide variable importance, however, such importance scores are constant across the entire dataset rather than spatiotemporally varied (Wang et al., 2021; Yuan et al., 2022b). While post-hoc analyses could interpret ML models (Altmann et al., 2010; Lundberg and Lee, 2017), inconsistent and unstable explanations can be derived with different post-hoc methods or settings (Slack et al., 2021; Molnar et al., 2020). Such limitations impede an interpretable and reliable way to understand the critical spatiotemporal processes from wet season to dry season (Reichstein et al., 2019; Jain et al., 2020).

We added more background about selected ML models, and described their advantages and disadvantages. We also included a table (Table 1) to show the strengths, potential limitations, and corresponding references for all the ML models.

L136-143, section 2.1:

Like the traditional artificial neural network (ANN) models, the LSTM is also built upon neurons and the non-linear activation functions; specifically, the LSTM uses gating mechanism (i.e., forget, input, and output gates) (Hochreiter and Schmidhuber, 1997; Wang and Yuan, 2019) to filter out useless information while keeping useful information underlying in the time series as hidden states (Fig. 1). Relative to traditional ANN, the LSTM has shown advantages in capturing short- and long-term dependencies in input time series (Hochreiter and Schmidhuber, 1997), such as the time-lagged controls from wet-to-dry season climate conditions on wildfires.

L206-220, 234-235 section 2.2:

The details of baseline models selected, including strengths, potential limitations, and their applications in wildfire studies and references are listed in Table 1. The ANN and LSTM have shown good performance on multiple earth science problems (Yuan et al., 2022a; Reichstein et al., 2019) including wildfires (Joshi and Sukumar, 2021; Zhu et al., 2021; Liang et al., 2019), however, the black-box nature of such models makes them lack interpretability. The DT method provides variable importance and is easily interpretable with its single tree structure, but prone to overfitting compared to RF and GBDT. The RF alleviates the overfitting through feature selection and ensemble learning (Breiman, 2001) while the GBDT avoids overfitting by constructing multiple trees with shallow depth (Ke et al., 2017). DT, RF, and GBDT provide variable importance scores for dominant driver inference, however, such importance scores are constant

across the entire dataset and thus impede detailed interpretation of the variable importance like over space and time. The aforementioned ML models have been commonly used in wildfire science (Jain et al., 2020).

**Table 1.** Strengths, potential limitations, and applications of selected baseline models in wildfire studies.

| Model (acronym)                                                     | Strengths                                                                                                                          | Potential limitations                                                                                                                                                          | Applications                                   |
|---------------------------------------------------------------------|------------------------------------------------------------------------------------------------------------------------------------|--------------------------------------------------------------------------------------------------------------------------------------------------------------------------------|------------------------------------------------|
| Random Forest (RF)<br>(Breiman, 2001)                               | Provide variable importance; Alleviate overfitting through feature selection and ensemble learning;                                | Constant variable importance rather than varied; time-consuming when building large trees; may not perform well on time series with lags                                       | (Gray et al., 2018b; Yu et al., 2020)          |
| Decision Tree (DT)<br>(Safavian and Landgrebe, 1991)                | Provide variable importance; easy to interoperate the single tree                                                                  | Prone to overfitting; constant variable importance rather than varied; time-consuming when building a large tree; may not perform well on time series with lags                | (Amatulli et al., 2006; Coffield et al., 2019) |
| Gradient Boosting Decision Tree (GBDT)<br>(Ke et al., 2017)         | Alleviate overfitting by building multiple shallow trees; generally fast because of the shallowness of each tree built             | Constant variable importance rather than varied; may not perform well on time series with lags                                                                                 | (Coffield et al., 2019; Jain et al., 2020)     |
| Artificial Neural Network (ANN)<br>(Ke et al., 2017)                | Show good performance on complex and non-linear problems; alleviate overfitting through techniques like dropout and regularization | Lack of interpretability; hard to know the optimal neural network structures for different problems                                                                            | (Joshi and Sukumar, 2021; Zhu et al., 2021)    |
| Long-Short-Term-Memory (LSTM)<br>(Hochreiter and Schmidhuber, 1997) | Show good performance on time series predictions; alleviate overfitting through techniques like dropout and regularization         | Lack of interpretability; may not be suitable for non-time series problems; vanishing gradient problem when deployed to long time series (Li et al., 2020; Liang et al., 2018) | (Liang et al., 2019; Natekar et al., 2021)     |

We discussed the variable importance differences between AttentionFire and three tree-based models (DT, RF, and GBDT) and compared their computational cost. L506-525, section 3.5:

We revealed the dominant, spatially heterogenous, and time lagged controls of climate wetness on ASA wildfires. Such climate wetness importance on ASA wildfires was consistent with previous findings (Andela and Van Der Werf, 2014; Chen et al., 2011) and also confirmed by the other three tree-based ML models (i.e., DT, RF, and GBDT) with variable importance (e.g., precipitation and VPD were regarded as the top-five most important variables in Fig. S7). However, differences existed across model identified most important drivers (Fig. 3 versus Fig. S7). The variable importance of AttentionFire model was spatiotemporally varied (Fig. 4) while tree-based model provided variable importance was constant over the entire dataset. We showed that the climate wetness was more (less) important in areas with large (small) burned areas and its importance also varied over time (Fig. 4), but the other MLs did not explicitly distinguish such differences. Albeit the higher accuracy and generally acceptable computation speed of AttentionFire (Table S2), its memory consumption and model training time could be up to 141% and 22 times higher than the other ML models. The implementation of LSTM in AttentionFire model is series instead of parallel, therefore, future work could improve the model efficiency by deploying some easy-for-

parallel-computing time series prediction frameworks (e.g., temporal convolutional attention (Lin et al., 2021) and self-attention (Mohammadi Farsani and Pazouki, 2020; Vaswani et al., 2017)).

We also provided the code for all baseline models to help readers understand the machine learning models.

L582-583, Code availability:

“The source code of AttentionFire\_v1.0 and all baseline machine learning models is archived at Zenodo repository: <https://zenodo.org/record/7416437#.Y5JnBXbMK5c>”

2. Providing more information about the data sets used to conduct this analysis to allow the reader to better understand and assess what was done.

Thanks for the suggestion. We included a table (Table 2) into the main text which described the data sets, their time step, units, origin, and references accordingly. The revision is shown as follows:

L245-248, L266-267, section 2.3:

Details of each dataset and corresponding references are listed in Table 2. The raw datasets were unified to the same spatial resolution (T62 resolution: ~210 km at the equator) at the monthly scale with a covering period from 1997 to 2015.

**Table 2.** Input and output variables and datasets of the AttentionFire model.

| Variable category | Variables (abbreviation, units)                                                                                                                                                                                                                                                                                            | Spatial (temporal) resolution | Dataset and reference                                  |
|-------------------|----------------------------------------------------------------------------------------------------------------------------------------------------------------------------------------------------------------------------------------------------------------------------------------------------------------------------|-------------------------------|--------------------------------------------------------|
| Wildfire          | Burned area (BA, hectares month <sup>-1</sup> )                                                                                                                                                                                                                                                                            | 0.25 degree (monthly)         | Global Fire Emissions Database 4 (Giglio et al., 2013) |
| Climate           | Precipitation (RAIN, mm s <sup>-1</sup> ), temperature (TA, K), surface air pressure (PA, Pa), specific humidity (SH, kg kg <sup>-1</sup> ), downward short-wave radiation (SW, W m <sup>-2</sup> ), wind speed (WIND, m s <sup>-1</sup> ), vapor pressure deficit (VPD, hPa) (VPD calculated according to (Bolton, 1980)) | ~1.9 degree (monthly)         | NCEP-DOE Reanalysis 2 (Kanamitsu et al., 2002)         |
| Fuel conditions   | Fuel moisture (FUELM, %), coarse wood debris (CWDC, gC m <sup>-2</sup> s <sup>-1</sup> ), vegetation biomass (VegC, gC m <sup>-2</sup> s <sup>-1</sup> ), litter biomass (LitterC, gC m <sup>-2</sup> s <sup>-1</sup> )                                                                                                    | ~1.9 degree (monthly)         | ELM prognostic simulations (Zhu et al., 2019)          |
| Human activities  | Population density (Popu, persons grid <sup>-1</sup> )                                                                                                                                                                                                                                                                     | ~1km (yearly)                 | (Dobson et al., 2000)                                  |
|                   | Road density (Road, km km <sup>-2</sup> )                                                                                                                                                                                                                                                                                  | 0.5 degree (yearly)           | (Meijer et al., 2018)                                  |
|                   | Livestock density (LS, number of livestock grid <sup>-1</sup> )                                                                                                                                                                                                                                                            | 0.5 degree (yearly)           | (Rothman-Ostrow et al., 2020)                          |
| Land cover        | Bare soil (Bare, %), Forest (Forest, %), and Grass (Grass, %)                                                                                                                                                                                                                                                              | 0.25 degree (yearly)          | LUH2 (Hurt et al., 2020a)                              |
| Oceanic indices   | Ocean Niño Index (ONI), Atlantic multidecadal Oscillation (AMO) index, Tropical Northern Atlantic (TNA) Index, and Tropical Southern Atlantic (TSA) Index                                                                                                                                                                  | monthly                       | NOAA Climate Indices (Noaa, 2021)                      |

3. Make it more clear how the model was validated and include a test against independent data withheld from any tuning to guard against overfitting.

We clarified the validation method accordingly. The validation method is similar to the leave-one-out validation, but instead of leaving one sample out, here we iteratively leave one-year data out for model evaluation and make sure the model has never seen the data for evaluation. Bellows are the revisions:

L228-232, section 2.2:

For each model, we iteratively leave one-year dataset out (i.e., a holdout dataset that model has never seen) for testing, one year data for validation (to avoid overfitting during training (Yuan et al., 2022b; Jabbar and Khan, 2015)), and use the remaining dataset for model training (i.e., tuning model parameters).

4. Add more explanation about how the future projections were conducted, what input data sets were used, and if and how they were stepped into the future.

We clarified how future projections were conducted, the input data, and how they were stepped into future. The future climate and fuel data was the outputs of CMIP6, and in the revised version, instead of using CESM only, we expanded the analysis to five CMIP6 Earth System Models (ESMs) that have required variables under low (SSP126) and high (SSP585) emission scenarios. We also clarified how we corrected the bias of model simulation relative to reanalysis data and discussed the uncertainty for future projections. Bellows are the revisions.

We clarified the future data, the bias correction, and how we conducted future projections. L269-273, section 2.3:

For future projection (2016-2055) of burned area with AttentionFire model, land use changes (Hurtt et al., 2020b), population growth, projected climate and fuel from fully coupled Earth System Model (ESM) simulations of CMIP6 (O'Neill et al., 2016) under low (SSP126) and high (SSP585) emission scenarios were used as the ML model input, respectively.

L279-294, section 2.3:

All available ESMs with outputs of historical and future (SSP126 and SSP585) fuel availability (i.e., biomass of coarse wood debris, vegetation, and litter) and climate variables (Table 2) were selected, including ACCESS-ESM1-5 (Ziehn et al., 2020), CESM2 (Danabasoglu et al., 2020), NorESM2-LM (Seland et al., 2020), NorESM2-MM (Seland et al., 2020), and TaiESM1 (Wang et al., 2021b). For each ESM, the variable bias was corrected with the mostly used linear scaling method (Maraun, 2016; Dangol et al., 2022; Shrestha et al., 2017) which adjusted the bias in model simulations based on the ratio of modeled and observed variable mean value. Then the bias corrected variables of each ESM were used to drive AttentionFire model for future burned area projection. Finally, given the uncertainty of each ESM, the multi-model ensemble (MME) mean of projected burned area was calculated (Li et al., 2022) and analyzed. Details of the bias correction method can be found in Maraun (2016). For future projections, temporally constant road and livestock density were used due to the lack of future data in the two scenarios (i.e., SSP585 and SSP126), and the AttentionFire model was not coupled in the ESMs. Such limitation and uncertainty were discussed in section 3.5.

We discussed the uncertainty for future projections. L539-553, section 3.5:

With the fully coupled ESMs of CMIP6, we analyzed future burned area changes under high (SSP585) and low (SSP126) emission scenarios in the ASA region. While the MME mean was considered, substantial uncertainty has been found across different ESMs in history (Yuan et al., 2022a; Yuan et al., 2021; Wu et al., 2020) and future (Li et al., 2022; Lauer et al., 2020). Further work therefore is needed to narrow the projection uncertainty of ESMs (e.g., with constraints of causality (Nowack et al., 2020; Li et al., 2022) and observations (Tokarska et al., 2020; Lauer et al., 2020) ). Meanwhile, for future projections, although land use and land cover changes, population growth, and climate and fuel changes were considered, constant livestock and road density were adopted due to lack of data. The impacts of livestock and road density therefore need further exploration with available data under different future scenarios. In addition, the AttentionFire model currently is not coupled with the ESM, therefore, the feedbacks among fires, climate, and biomass were ignored. To analyze such feedbacks, the AttentionFire model needs to surrogate the original fire module and be coupled within the ESM (Zhu et al., 2021).

5. Provide methods, background, and discussion for section 3.3 which are missing.

Sorry for the missing. We updated the Introduction, Methods, and Results and Discussions to provide more background and analyses for section 3.3. Bellows are the revisions.

We provided more background about the impacts of ocean dynamics on wildfires. L71-78, section 1:

Meanwhile, ocean dynamics (e.g., El Niño-Southern Oscillation, ENSO) may also exert considerable influences on ASA wildfires through influencing wet and wet-to-dry season climate and fuel conditions (Yu et al., 2020; Chen et al., 2016; Andela and Van Der Werf, 2014; Chen et al., 2011; Chen et al., 2017). The time-lags between ocean dynamics and wildfires can be even longer than that between climate and wildfires (Chen et al., 2020), which enable wildfire predictions ahead of fire season (Chen et al., 2011; Chen et al., 2016; Chen et al., 2020; Turco et al., 2018).

We gave more detailed introduction to the ocean indices. L249-264, section 2.3:

In addition to the local socio-environmental drivers, we also explored the impacts of ocean indices on burned area predictions. Chen et al. (2011) found that wildfires in South America were closely linked to the Oceanic Niño Index (ONI), and Atlantic multidecadal Oscillation (AMO) index. The ONI and AMO reflected the sea surface temperature (SST) anomalies in the tropical Pacific and north Atlantic. The SST anomalies directly affected ocean-atmosphere interactions and thus the wet, wet-to-dry, and onset of dry season climate in South America (Chen et al., 2011). The two indexes were significantly correlated with peak fire month wildfires 3 to 7 months later and could predict fire season wildfires in many regions of South America with lead times of 3 to 5 months (Chen et al., 2011). The controls of SST anomalies in tropical Pacific on climate and thus wildfires were also found in northern and southern Africa (Andela and Van Der Werf, 2014). In addition, SST anomalies in tropical northern and southern Atlantic could also affect wildfires in South America (Chen et al., 2016) and Africa (Yu et al., 2020; Chen et al., 2020). Therefore, we included ocean indices (Table 2) and investigated their impacts on wildfire predictions with the AttentionFire model (see section 3.4).

We discussed the impacts of ocean indices against other variables on wildfire predictions. L431-435, section 3.3:

While the mean variable importance of OIs was consistently lower than that of local climate (Fig. S4) across the three regions, the OIs did provide additional information for long-term predictions with lower biases (Fig.



5). The results demonstrated the potential usage of teleconnections for long leading time burned area predictions (Chen et al., 2020; Chen et al., 2016; Chen et al., 2011).

6. Address via analysis or discuss the impact of bias in CESM versus the reanalysis data, the impact of coupling between fire, climate, and biomass, and model/scenario uncertainty on the future projections presented.

We added discussion on how we corrected the bias of Earth System Model (ESM) variables based on reanalysis data, and included all available ESMs of CMIP6 under different scenarios (SSP126 versus SSP585) for future projections. We found that under SSP585, the future burned area trends (i.e., decreasing trend in NHAF, dampened trend in SHAF, and increasing trend in SHSA) were robust with the multiple ESM ensemble mean; under SSP126, the decreasing trend in NHAF disappeared (Fig. S5a) and the increasing trend in SHSA was reduced by ~69% (Fig. S5c), implying the big influences of climate changes and socioeconomic development pathways on future burn area changes in the two regions. In addition, we have discussed the fact that the AttentionFire model currently was not coupled in ESMs, and such decoupling could be a limitation and need further exploration. We revised the manuscript as follows.

We clarified the bias correction and included more ESMs. L279-294, section 2.3:

All available ESMs with outputs of historical and future (SSP126 and SSP585) fuel availability (i.e., biomass of coarse wood debris, vegetation, and litter) and climate variables (Table 2) were selected, including ACCESS-ESM1-5 (Ziehn et al., 2020), CESM2 (Danabasoglu et al., 2020), NorESM2-LM (Seland et al., 2020), NorESM2-MM (Seland et al., 2020), and TaiESM1(Wang et al., 2021b). For each ESM, the variable bias was corrected with the mostly used linear scaling method (Maraun, 2016; Dangol et al., 2022; Shrestha et al., 2017) which adjusted the bias in model simulations based on the ratio of modeled and observed variable mean value. Then the bias corrected variables of each ESM were used to drive AttentionFire model for future burned area projection. Finally, given the uncertainty of each ESM, the multi-model ensemble (MME) mean of projected burned area was calculated (Li et al., 2022) and analyzed. Details of the bias correction method can be found in Maraun (2016). For future projections, temporally constant road and livestock density were used due to the lack of future data in the two scenarios (i.e., SSP585 and SSP126), and the AttentionFire model was not coupled in the ESMs. Such limitation and uncertainty were discussed in section 3.5.

We updated the results and analyses for the future projections under SSP585 and SSP126. L468-480, section 3.4:

Considering land use changes, population growth, and projected climate and fuel conditions under the SSP585 high emission scenario, our model predicted that burned areas in the NHAF region will continue to decline; the currently increasing trend will be dampened in the SHAF region, and the currently decreasing trend will be reversed in SHSA region (Fig. 6). The increasing trend in SHSA, decreasing trend in NHAF, and dampened trend in SHAF under SSP585 were robust when projecting burned area till the end of 21<sup>st</sup> century (Fig. S5). Over NHAF and SHSA, burned area trends at the gridcell level were mostly robust (Fig. 6a, c;  $p < 0.05$ ) and of the same sign, thus resulting in a robust trend at regional scale. Under the low emission scenario (i.e., SSP126), the decreasing trend in NHAF disappeared (Fig. S5a) and the increasing trend in SHSA was reduced by ~69% (Fig. S5c), implying the big influences of climate changes and socioeconomic development pathways on future burn area changes in the two regions.

We acknowledged that the AttentionFire model did not couple with ESMs and discussed such limitation.

With the fully coupled ESMs of CMIP6, we analyzed future burned area changes under high (SSP585) and low (SSP126) emission scenarios in the ASA region. While the MME mean was considered, substantial uncertainty has been found across different ESMs in history (Yuan et al., 2022a; Yuan et al., 2021; Wu et al., 2020) and future (Li et al., 2022; Lauer et al., 2020). Further work therefore is needed to narrow the projection uncertainty of ESMs (e.g., with constraints of causality (Nowack et al., 2020; Li et al., 2022) and observations (Tokarska et al., 2020; Lauer et al., 2020)). Meanwhile, for future projections, although land use and land cover changes, population growth, and climate and fuel changes were considered, constant livestock and road density were adopted due to lack of data. The impacts of livestock and road density therefore need further exploration with available data under different future scenarios. In addition, the AttentionFire model currently is not coupled with the ESM, therefore, the feedbacks among fires, climate, and biomass were ignored. To analyze such feedbacks, the AttentionFire model needs to surrogate the original fire module and be coupled within the ESM (Zhu et al., 2021).

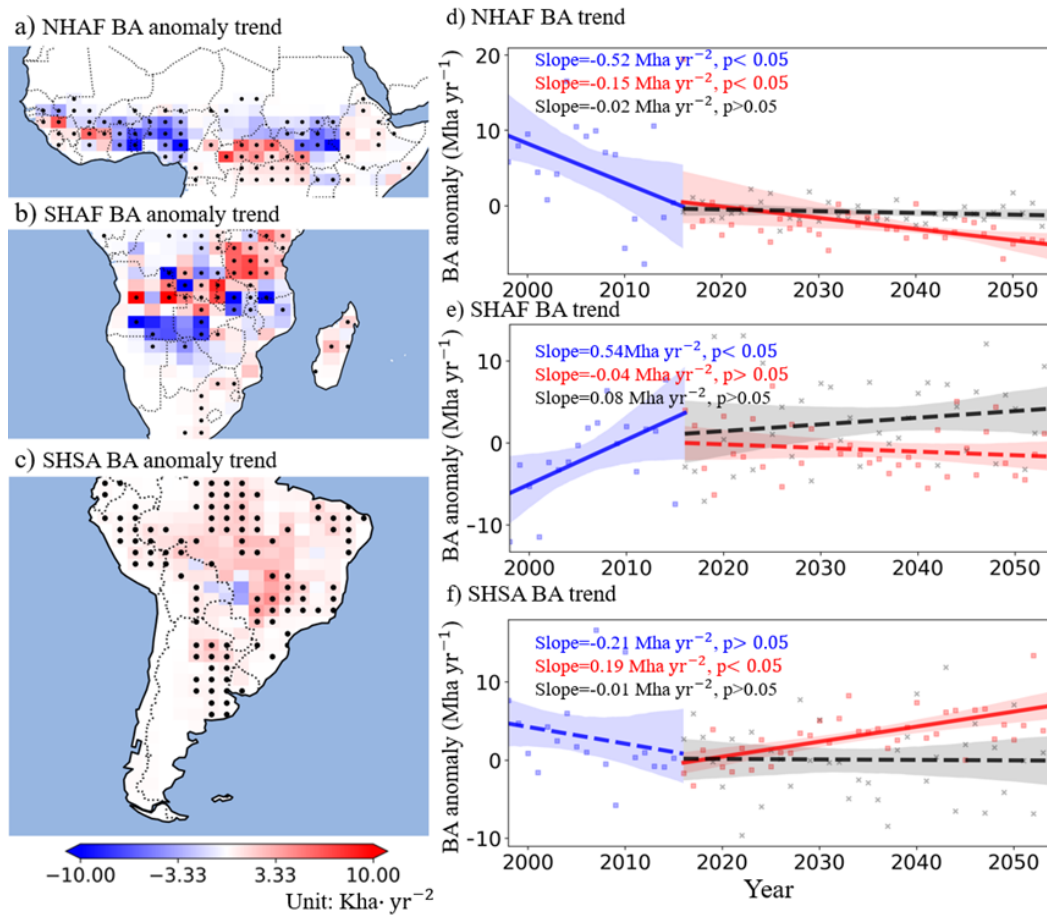

Fig. 6: Future burned area trends under the SSP585 high emission scenario. (a-c) spatial distribution of fire season burned area trends using drivers with interannual variations; dots in (a-c) indicate gridcells with statistically significant changes in the trend. (d-f) regionally aggregated burned area changes with historical mean subtracted. Blue and red lines respectively represent burned area anomaly in history and future; the black line represents future burned area trend while removing the interannual variations of the dominant



variable. Solid lines represented significant BA trends ( $p$  value  $<0.05$ ) while dashed lines represented non-significant BA trends.

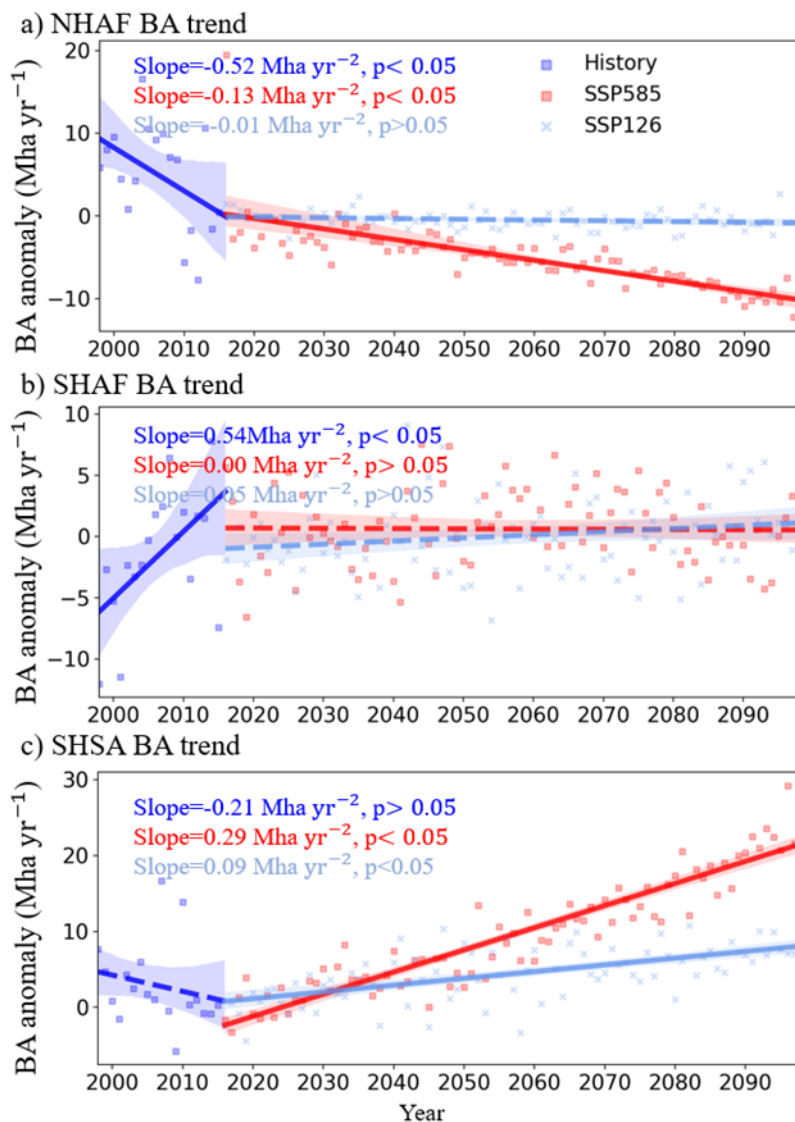

**Fig. S5.** Burned area changes in history and future. Deep blue and light blue lines represent burned area changes under SSP585 and SSP126, respectively, and red lines represent burned area changes in history. Solid lines represented significant ( $p < 0.05$ ) burned area trends while dashed lines represented non-significant trends.

#### Specific comments:

1. L24-27: I suggest also mentioning anthropogenic drivers as they're included in the model. Currently, only climate is highlighted.

Revised as suggested. The sentence was revised as “Here, we developed an interpretable Machine Learning (ML) fire model (AttentionFire\_v1.0) to resolve the complex controls of climate **and human activities** on burned area and to better predict burned areas over ASA regions.”

2. L41: Placing this emissions number in the context of the carbon budget of these regions using published values could better highlight the importance of this work.

We placed the number of the wildfire emitted carbon accordingly:

L40-42, section 1:

“Over African and South American (ASA) regions, where more than 70% of global burned area occurs, wildfires emit  $\sim 1.4 \text{ PgC yr}^{-1}$  ( $\sim 65\%$  of global wildfire emissions (Werf et al., 2017a))”

3. L105-108: I suggest adding more detail here, especially for a reader who is not familiar with machine learning models. That is define black boxed and explain why more complex machine learning models are often less interpretable in straightforward terms. The acronym LSTM should be defined here as well.

We added more details of the model interpretability, the black box nature of machine learning models, and the reasons why they are less interpretable. Bellows are the revisions:

L111-122, section 1:

For example, the commonly used neural network or deep learning models (Zhu et al., 2022; Joshi and Sukumar, 2021) themselves are complex and built upon hidden neural layers with non-linear activation functions and thus cannot directly identify the relative importance of different drivers for wildfires (Murdoch et al., 2019; Jain et al., 2020). A few ML models (e.g., decision tree and random forest) provide variable importance, however, such importance scores are constant across the entire dataset rather than spatiotemporally varied (Wang et al., 2021; Yuan et al., 2022b). While post-hoc analyses could interpret ML models (Altmann et al., 2010; Lundberg and Lee, 2017), inconsistent and unstable explanations can be derived with different post-hoc methods or settings (Slack et al., 2021; Molnar et al., 2020). Such limitations impede an interpretable and reliable way to understand the critical spatiotemporal processes from wet season to dry season (Reichstein et al., 2019; Jain et al., 2020).

The acronym LSTM was defined when it was mentioned by first:

L123-124, section 1:

“we developed a wildfire model (AttentionFire) leveraging on an interpretable Long-Short-Term-Memory (LSTM) framework”.

4. L120—130/140-179/figure 1: More background is needed in this section, especially for a reader who is less familiar with artificial neural networks. That is I suggest stating that an LSTM is a type of ANN and explaining its practical advantages and disadvantages versus a typical ANN, and the Naïve LSTM in straightforward terms. Maybe this could also take the form of a table. Figure 1 could be better tied into the text with definitions given for more specific terminology used.

Thanks for the suggestion. We added more background about the model, and stated that LSTM is a type of ANN. We compared LSTM against ANN, and described its advantages and disadvantages. We also included a table (Table 1) to show the strengths, potential limitations, and corresponding references for all the machine learning models used so that readers can get more information. Bellows are the revisions:

L136-143, section 2.1:

Like the traditional artificial neural network (ANN) models, the LSTM is also built upon neurons and the non-linear activation functions; specifically, the LSTM uses gating mechanism (i.e., forget, input, and output gates) (Hochreiter and Schmidhuber, 1997; Wang and Yuan, 2019) to filter out useless information while keeping useful information underlying in the time series as hidden states (Fig. 1). Relative to traditional ANN, the LSTM has shown advantages in capturing short- and long-term dependencies in input time series (Hochreiter and Schmidhuber, 1997), such as the time-lagged controls from wet-to-dry season climate conditions on wildfires.

L171, section 2.1:

“please refer to Li et al. (2020) for the details of the Gates in Fig. 1”.

L206-220, 234-235 section 2.2:

The details of baseline models selected, including strengths, potential limitations, and their applications in wildfire studies and references are listed in Table 1. The ANN and LSTM have shown good performance on multiple earth science problems (Yuan et al., 2022a; Reichstein et al., 2019) including wildfires (Joshi and Sukumar, 2021; Zhu et al., 2021; Liang et al., 2019), however, the black-box nature of such models makes them lack interpretability. The DT method provides variable importance and is easily interpretable with its single tree structure, but prone to overfitting compared to RF and GBDT. The RF alleviates the overfitting through feature selection and ensemble learning (Breiman, 2001) while the GBDT avoids overfitting by constructing multiple trees with shallow depth (Ke et al., 2017). DT, RF, and GBDT provide variable importance scores for dominant driver inference, however, such importance scores are constant across the entire dataset and thus impede detailed interpretation of the variable importance like over space and time. The aforementioned ML models have been commonly used in wildfire science (Jain et al., 2020).

**Table 1.** Strengths, potential limitations, and applications of selected baseline models in wildfire studies.

| Model (acronym)                                                   | Strengths                                                                                                                                      | Potential limitations                                                                                                                                                          | Applications                                         |
|-------------------------------------------------------------------|------------------------------------------------------------------------------------------------------------------------------------------------|--------------------------------------------------------------------------------------------------------------------------------------------------------------------------------|------------------------------------------------------|
| Random Forest (RF)<br>(Breiman, 2001)                             | Provide variable importance;<br>Alleviate overfitting through<br>feature selection and ensemble<br>learning;                                   | Constant variable importance<br>rather than varied; time-<br>consuming when building<br>large trees; may not perform<br>well on time series with lags                          | (Gray et al.,<br>2018b; Yu et al.,<br>2020)          |
| Decision Tree (DT)<br>(Safavian and<br>Landgrebe, 1991)           | Provide variable importance; easy<br>to interoperate the single tree                                                                           | Prone to overfitting; constant<br>variable importance rather<br>than varied; time-consuming<br>when building a large tree;<br>may not perform well on<br>time series with lags | (Amatulli et al.,<br>2006; Coffield et<br>al., 2019) |
| Gradient Boosting<br>Decision Tree<br>(GBDT)<br>(Ke et al., 2017) | Alleviate overfitting by building<br>multiple shallow trees; generally<br>fast because of the shallowness of<br>each tree built                | Constant variable importance<br>rather than varied; may not<br>perform well on time series<br>with lags                                                                        | (Coffield et al.,<br>2019; Jain et al.,<br>2020)     |
| Artificial Neural<br>Network (ANN)<br>(Ke et al., 2017)           | Show good performance on<br>complex and non-linear problems;<br>alleviate overfitting through<br>techniques like dropout and<br>regularization | Lack of interpretability; hard<br>to know the optimal neural<br>network structures for<br>different problems                                                                   | (Joshi and<br>Sukumar, 2021;<br>Zhu et al., 2021)    |
| Long-Short-Term-<br>Memory (LSTM)                                 | Show good performance on time<br>series predictions; alleviate<br>overfitting through techniques<br>like dropout and regularization            | Lack of interpretability; may<br>not be suitable for non-time<br>series problems; vanishing<br>gradient problem when                                                           | (Liang et al.,<br>2019; Natekar et<br>al., 2021)     |

|                                    |  |                                                                    |  |
|------------------------------------|--|--------------------------------------------------------------------|--|
| (Hochreiter and Schmidhuber, 1997) |  | deployed to long time series (Li et al., 2020; Liang et al., 2018) |  |
|------------------------------------|--|--------------------------------------------------------------------|--|

5. L192-193/198-207: The description of the data sets, their time step (i.e. daily, monthly, etc), units, and origin should be included here. I also suggest moving table S2 into the text and editing it to include more information.

Thanks for the suggestion. We moved Table S2 into the main text as Table 2, and described the data sets, their time step, units, and origin accordingly. The revision is shown as follows:

L245-248, L266-267, section 2.3:

Details of each dataset and corresponding references are listed in Table 2. The raw datasets were unified to the same spatial resolution (T62 resolution:  $\sim 210$  km at the equator) at the monthly scale with a covering period from 1997 to 2015.

Table 2. Input and output variables and datasets of the AttentionFire model.

| Variable category | Variables (abbreviation, units)                                                                                                                                                                                                                                                                                            | Spatial (temporal) resolution | Dataset and reference                                  |
|-------------------|----------------------------------------------------------------------------------------------------------------------------------------------------------------------------------------------------------------------------------------------------------------------------------------------------------------------------|-------------------------------|--------------------------------------------------------|
| Wildfire          | Burned area (BA, hectares month <sup>-1</sup> )                                                                                                                                                                                                                                                                            | 0.25 degree (monthly)         | Global Fire Emissions Database 4 (Giglio et al., 2013) |
| Climate           | Precipitation (RAIN, mm s <sup>-1</sup> ), temperature (TA, K), surface air pressure (PA, Pa), specific humidity (SH, kg kg <sup>-1</sup> ), downward short-wave radiation (SW, W m <sup>-2</sup> ), wind speed (WIND, m s <sup>-1</sup> ), vapor pressure deficit (VPD, hPa) (VPD calculated according to (Bolton, 1980)) | $\sim 1.9$ degree (monthly)   | NCEP-DOE Reanalysis 2 (Kanamitsu et al., 2002)         |
| Fuel conditions   | Fuel moisture (FUELM, %), coarse wood debris (CWDC, gC m <sup>-2</sup> s <sup>-1</sup> ), vegetation biomass (VegC, gC m <sup>-2</sup> s <sup>-1</sup> ), litter biomass (LitterC, gC m <sup>-2</sup> s <sup>-1</sup> )                                                                                                    | $\sim 1.9$ degree (monthly)   | ELM prognostic simulations (Zhu et al., 2019)          |
| Human activities  | Population density (Popu, persons grid <sup>-1</sup> )                                                                                                                                                                                                                                                                     | $\sim 1$ km (yearly)          | (Dobson et al., 2000)                                  |
|                   | Road density (Road, km km <sup>-2</sup> )                                                                                                                                                                                                                                                                                  | 0.5 degree (yearly)           | (Meijer et al., 2018)                                  |
|                   | Livestock density (LS, number of livestock grid <sup>-1</sup> )                                                                                                                                                                                                                                                            | 0.5 degree (yearly)           | (Rothman-Ostrow et al., 2020)                          |
| Land cover        | Bare soil (Bare, %), Forest (Forest, %), and Grass (Grass, %)                                                                                                                                                                                                                                                              | 0.25 degree (yearly)          | LUH2 (Hurt et al., 2020a)                              |
| Oceanic indices   | Ocean Niño Index (ONI), Atlantic multidecadal Oscillation (AMO) index, Tropical Northern Atlantic (TNA) Index, and Tropical Southern Atlantic (TSA) Index                                                                                                                                                                  | monthly                       | NOAA Climate Indices (Noaa, 2021)                      |

6. L193-195: Please clarify the validation method used here. Is this a leave-one-out cross-validation? Was any model tuning conducted and what data was used to do that? Ideally, the models would be validated against independent data that was withheld from any tuning/testing to guard against overfitting.

We clarified the validation method accordingly. The validation method is similar to the leave-one-out validation, but instead of leaving one sample out, here we iteratively leave one-year data out for model evaluation and make sure the model has never seen the data for evaluation. Bellows are the revisions:

L228-232, section 2.2:

For each model, we iteratively leave one-year dataset out (i.e., a holdout dataset that model has never seen) for testing, one year data for validation (to avoid overfitting during training (Yuan et al., 2022b; Jabbar and Khan, 2015)), and use the remaining dataset for model training (i.e., tuning model parameters).

7. L208-215: These future data need to be prefaced and explained a bit more. Was AttentionFire coupled with CESM or are these simply outputs from CESM? How were variables like road network density and livestock projected into the future? If AttentionFire was not coupled in CESM was bias correction applied to deal with any biases present in the model run, but not the reanalysis? Could these biases impact the results or trends predicted by AttentionFire?

We explained the future data, and clarified that the AttentionFire model used the outputs from Earth System Models (ESMs) of CMIP6 instead of being coupled with CESM. In the revised version, instead of using CESM only, we included all available ESMs of CMIP6 under low (SSP126) and high (SSP585) emission scenarios, respectively. We corrected the bias of CMIP6 model simulated variables relative to reanalysis data. Currently, the AttentionFire model was not coupled with the ESM, and constant road network density and livestock were used due to lack of temporal varied data in the future. We clarified and discussed such limitations. Bellows are the revisions.

We described the future data. L269-273, section 2.3:

For future projection (2016-2055) of burned area with AttentionFire model, land use changes (Hurtt et al., 2020b), population growth, projected climate and fuel from fully coupled Earth System Model (ESM) simulations of CMIP6 (O'Neill et al., 2016) under low (SSP126) and high (SSP585) emission scenarios were used as the ML model input, respectively.

We clarified the bias correction, and future projection limitations. L279-294, section 2.3:

All available ESMs with outputs of historical and future (SSP126 and SSP585) fuel availability (i.e., biomass of coarse wood debris, vegetation, and litter) and climate variables (Table 2) were selected, including ACCESS-ESM1-5 (Ziehn et al., 2020), CESM2 (Danabasoglu et al., 2020), NorESM2-LM (Seland et al., 2020), NorESM2-MM (Seland et al., 2020), and TaiESM1 (Wang et al., 2021b). For each ESM, the variable bias was corrected with the mostly used linear scaling method (Maraun, 2016; Dangol et al., 2022; Shrestha et al., 2017) which adjusted the bias in model simulations based on the ratio of modeled and observed variable mean value. Then the bias corrected variables of each ESM were used to drive AttentionFire model for future burned area projection. Finally, given the uncertainty of each ESM, the multi-model ensemble (MME) mean of projected burned area was calculated (Li et al., 2022) and analyzed. Details of the bias correction method can be found in Maraun (2016). For future projections, temporally constant road and livestock density were used due to the lack of future data in the two scenarios (i.e., SSP585 and SSP126), and the AttentionFire model was not coupled in the ESMs. Such limitation and uncertainty were discussed in section 3.5.

We discussed the limitations for future projections. L539-553, section 3.5:

With the fully coupled ESMs of CMIP6, we analyzed future burned area changes under high (SSP585) and low (SSP126) emission scenarios in the ASA region. While the MME mean was considered, substantial

uncertainty has been found across different ESMs in history (Yuan et al., 2022a; Yuan et al., 2021; Wu et al., 2020) and future (Li et al., 2022; Lauer et al., 2020). Further work therefore is needed to narrow the projection uncertainty of ESMs (e.g., with constraints of causality (Nowack et al., 2020; Li et al., 2022) and observations (Tokarska et al., 2020; Lauer et al., 2020) ). Meanwhile, for future projections, although land use and land cover changes, population growth, and climate and fuel changes were considered, constant livestock and road density were adopted due to lack of data. The impacts of livestock and road density therefore need further exploration with available data under different future scenarios. In addition, the AttentionFire model currently is not coupled with the ESM, therefore, the feedbacks among fires, climate, and biomass were ignored. To analyze such feedbacks, the AttentionFire model needs to surrogate the original fire module and be coupled within the ESM (Zhu et al., 2021).

8. Fig 2: Suggest editing the caption to provide more information about each panel of the figure.

We revised the caption of Fig. 2 accordingly. The revision is shown as follows.

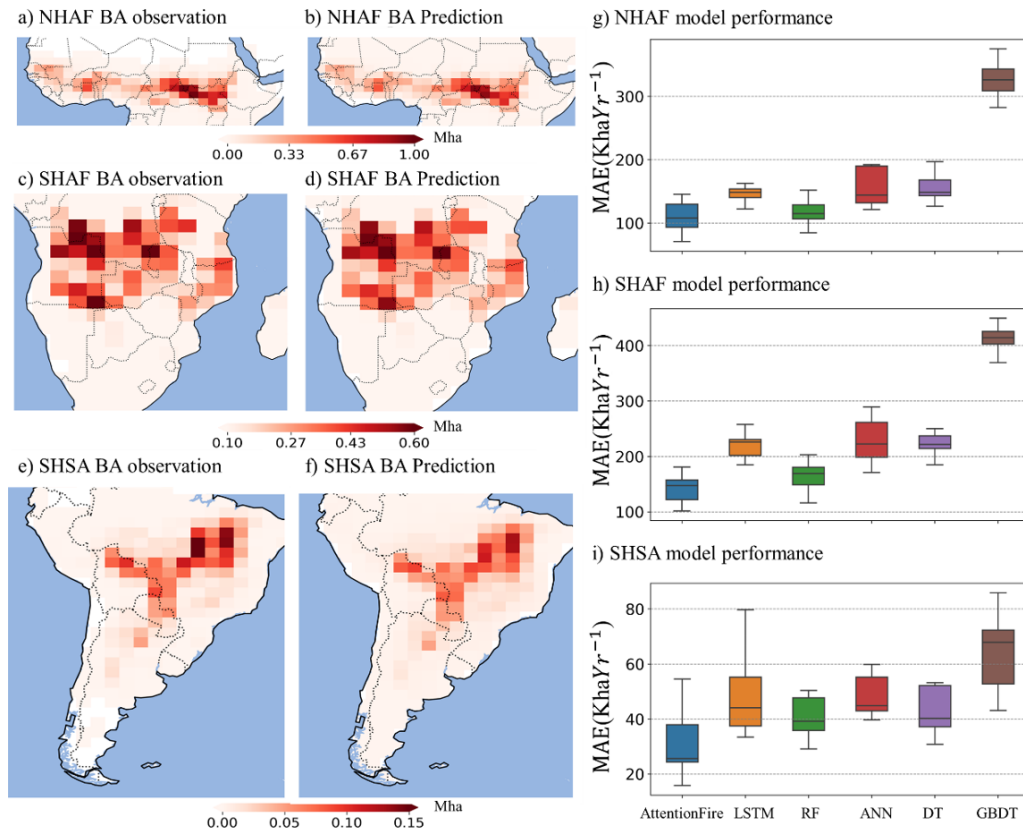

Fig. 2. The AttentionFire model accurately captured burned area spatial dynamics. Spatial distribution of observed and AttentionFire predicted fire season mean burned area (BA) with one-month lead time in Northern Hemisphere Africa (NHAF) (a-b), Southern Hemisphere Africa (SHAF) (c-d), and Southern Hemisphere South America (SHSA) (e-f) regions. (g-i) Performance (in terms of mean absolute error between predicted and observed burned area) of AttentionFire and other five baseline models, including Long-Short-Term-Memory (LSTM), random forest (RF), artificial neural network (ANN), decision tree (DT), and gradient boosting decision tree (GBDT).



9. Figure 3: It's unclear from the figure caption what each of these three panels shows as no letter codes are provided.

Sorry for the unclear. We provided the letter code for each panel of Fig. 3. The revision is shown as bellows.

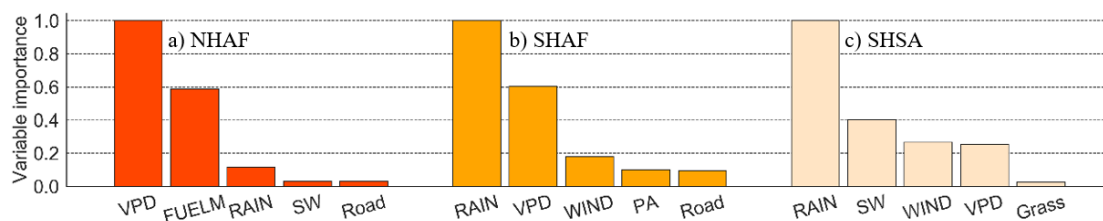

Fig. 3: Ranked top-five important variables for fire-season burned area in Northern Hemisphere Africa (NHAF) (a), Southern Hemisphere Africa (SHAF) (b), and Southern Hemisphere South America (SHSA) (c). For each gridcell within each study region, there is a mean variable weight, representing the importance of the variable for fire prediction in the gridcell. For each region, the variable weights are summed weighted by its corresponding mean burned areas, and normalized.

10. Figure 3: Was an attempt made to simplify the model by removing low-ranked data sets? This could be beneficial if it eliminates unimportant variables which are uncertain or hard to obtain in the future

Figure 3 was used to show the dominant drivers of wildfires. Instead of eliminating unimportant drivers, the AttentionFire model assigned larger weights to more important variables and smaller weights to less important variables. Less important variables could also affect model performance. For example, we found that the variable importance of ocean indices was lower than that of climate variables (Fig. S4) but ocean indices significantly affected the model performance (Fig. 5). Therefore, we used all the variables. We agree that the uncertainty of used variables could affect future projections, and discussed such uncertainty:

L539-549, section 3.5:

With the fully coupled ESMs of CMIP6, we analyzed future burned area changes under high (SSP585) and low (SSP126) emission scenarios in the ASA region. While the MME mean was considered, substantial uncertainty has been found across different ESMs in history (Yuan et al., 2022a; Yuan et al., 2021; Wu et al., 2020) and future (Li et al., 2022; Lauer et al., 2020). Further work therefore is needed to narrow the projection uncertainty of ESMs (e.g., with constraints of causality (Nowack et al., 2020; Li et al., 2022) and observations (Tokarska et al., 2020; Lauer et al., 2020) ). Meanwhile, for future projections, although land use and land cover changes, population growth, and climate and fuel changes were considered, constant livestock and road density were adopted due to lack of data. The impacts of livestock and road density therefore need further exploration with available data under different future scenarios.

11. Section 3.3: These experiments are not included in the methods, no background for this is included in the introduction and, acronyms are not defined. Substantial background needs to be added here.

Sorry for the missing. We updated the Introduction, Methods, and Results and Discussions to provide more background and analyses of the impacts of ocean indices on wildfires. The acronyms were also defined. Bellows are the revisions.

We provided more background about the impacts of ocean dynamics on wildfires. L71-78, section 1:

Meanwhile, ocean dynamics (e.g., El Niño-Southern Oscillation, ENSO) may also exert considerable influences on ASA wildfires through influencing wet and wet-to-dry season climate and fuel conditions (Yu et al., 2020; Chen et al., 2016; Andela and Van Der Werf, 2014; Chen et al., 2011; Chen et al., 2017). The time-lags between ocean dynamics and wildfires can be even longer than that between climate and wildfires (Chen et al., 2020), which enable wildfire predictions ahead of fire season (Chen et al., 2011; Chen et al., 2016; Chen et al., 2020; Turco et al., 2018).

We gave more detailed introduction to the ocean indices. L249-264, section 2.3:

In addition to the local socio-environmental drivers, we also explored the impacts of ocean indices on burned area predictions. Chen et al. (2011) found that wildfires in South America were closely linked to the Oceanic Niño Index (ONI), and Atlantic multidecadal Oscillation (AMO) index. The ONI and AMO reflected the sea surface temperature (SST) anomalies in the tropical Pacific and north Atlantic. The SST anomalies directly affected ocean-atmosphere interactions and thus the wet, wet-to-dry, and onset of dry season climate in South America (Chen et al., 2011). The two indexes were significantly correlated with peak fire month wildfires 3 to 7 months later and could predict fire season wildfires in many regions of South America with lead times of 3 to 5 months (Chen et al., 2011). The controls of SST anomalies in tropical Pacific on climate and thus wildfires were also found in northern and southern Africa (Andela and Van Der Werf, 2014). In addition, SST anomalies in tropical northern and southern Atlantic could also affect wildfires in South America (Chen et al., 2016) and Africa (Yu et al., 2020; Chen et al., 2020). Therefore, we included ocean indices (Table 2) and investigated their impacts on wildfire predictions with the AttentionFire model (see section 3.4).

We discussed the impacts of ocean indices against other variables on wildfire predictions. L431-435, section 3.3:

While the mean variable importance of OIs was consistently lower than that of local climate (Fig. S4) across the three regions, the OIs did provide additional information for long-term predictions with lower biases (Fig. 5). The results demonstrated the potential usage of teleconnections for long leading time burned area predictions (Chen et al., 2020; Chen et al., 2016; Chen et al., 2011).

12. Section 3.4: Several points regarding the future projections are not addressed here. First is the possibility that there is bias in CESM which is not present in the reanalysis data. Should a bias correction be applied? Second, fire, climate, and biomass on the landscape are all coupled. Therefore there is a need to address how this could impact the estimates and trends given if the fire model is not coupled with CESM. Finally, if the models are not coupled only a single model run using a strong emissions scenario is presented here. I'd suggest either presenting additional scenarios and including other models or explaining how model and scenario uncertainty could impact the results, their applicability to this region, and the significant trends highlighted.

We clarified how we corrected the bias of Earth System Models (ESMs) relative to reanalysis data, and included all available ESMs of CMIP6 under different scenarios (SSP126 versus SSP585) for future projections. We found that under SSP585, the future burned area trends (i.e., decreasing trend in NHAf,

nonsignificant trend in SHAF, and increasing trend in SHSA) were robust with the multiple ESM ensemble mean both for 2016-2055 and 2016-2100; under SSP126, the decreasing trend in NHAF disappeared and the increasing trend in SHSA was reduced by ~69% (Fig. S5c), implying the big influences of climate changes and socioeconomic development pathways on future burn area changes in the two regions. In addition, we clarified that the AttentionFire model currently was not coupled in ESMs, and such decoupling could be a limitation and need further exploration. We revised the manuscript as follows.

We clarified the bias correction and included more ESMs. L279-294, section 2.3:

All available ESMs with outputs of historical and future (SSP126 and SSP585) fuel availability (i.e., biomass of coarse wood debris, vegetation, and litter) and climate variables (Table 2) were selected, including ACCESS-ESM1-5 (Ziehn et al., 2020), CESM2 (Danabasoglu et al., 2020), NorESM2-LM (Seland et al., 2020), NorESM2-MM (Seland et al., 2020), and TaiESM1(Wang et al., 2021b). For each ESM, the variable bias was corrected with the mostly used linear scaling method (Maraun, 2016; Dangol et al., 2022; Shrestha et al., 2017) which adjusted the bias in model simulations based on the ratio of modeled and observed variable mean value. Then the bias corrected variables of each ESM were used to drive AttentionFire model for future burned area projection. Finally, given the uncertainty of each ESM, the multi-model ensemble (MME) mean of projected burned area was calculated (Li et al., 2022) and analyzed. Details of the bias correction method can be found in Maraun (2016). For future projections, temporally constant road and livestock density were used due to the lack of future data in the two scenarios (i.e., SSP585 and SSP126), and the AttentionFire model was not coupled in the ESMs. Such limitation and uncertainty were discussed in section 3.5.

We updated the results and analyses for the future projections under SSP585 and SSP126. L468-480, section 3.4:

Considering land use changes, population growth, and projected climate and fuel conditions under the SSP585 high emission scenario, our model predicted that burned areas in the NHAF region will continue to decline; the currently increasing trend will be dampened in the SHAF region, and the currently decreasing trend will be reversed in SHSA region (Fig. 6). The increasing trend in SHSA, decreasing trend in NHAF, and dampened trend in SHAF under SSP585 were robust when projecting burned area till the end of 21<sup>st</sup> century (Fig. S5). Over NHAF and SHSA, burned area trends at the gridcell level were mostly robust (Fig. 6a, c;  $p < 0.05$ ) and of the same sign, thus resulting in a robust trend at regional scale. Under the low emission scenario (i.e., SSP126), the decreasing trend in NHAF disappeared (Fig. S5a) and the increasing trend in SHSA was reduced by ~69% (Fig. S5c), implying the big influences of climate changes and socioeconomic development pathways on future burn area changes in the two regions.

We acknowledged that the AttentionFire model did not couple with ESMs and discussed such limitation.

L539-553, section 3.5:

With the fully coupled ESMs of CMIP6, we analyzed future burned area changes under high (SSP585) and low (SSP126) emission scenarios in the ASA region. While the MME mean was considered, substantial uncertainty has been found across different ESMs in history (Yuan et al., 2022a; Yuan et al., 2021; Wu et al., 2020) and future (Li et al., 2022; Lauer et al., 2020). Further work therefore is needed to narrow the projection uncertainty of ESMs (e.g., with constraints of causality (Nowack et al., 2020; Li et al., 2022) and observations (Tokarska et al., 2020; Lauer et al., 2020) ). Meanwhile, for future projections, although land use and land cover changes, population growth, and climate and fuel changes were considered, constant livestock and road density were adopted due to lack of data. The impacts of livestock and road density therefore need further exploration with available data under different future scenarios. In addition, the

AttentionFire model currently is not coupled with the ESM, therefore, the feedbacks among fires, climate, and biomass were ignored. To analyze such feedbacks, the AttentionFire model needs to surrogate the original fire module and be coupled within the ESM (Zhu et al., 2021).

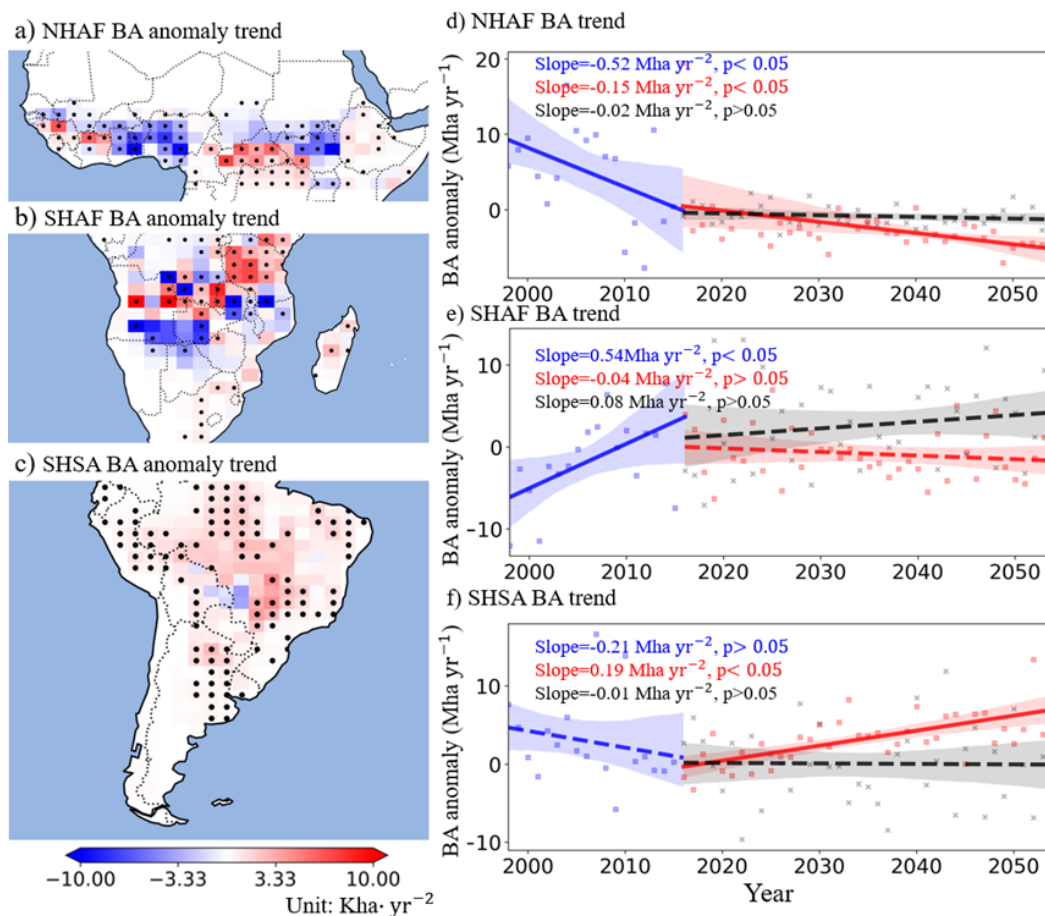

Fig. 6: Future burned area trends under the SSP585 high emission scenario. (a-c) spatial distribution of fire season burned area trends using drivers with interannual variations; dots in (a-c) indicate gridcells with statistically significant changes in the trend. (d-f) regionally aggregated burned area changes with historical mean subtracted. Blue and red lines respectively represent burned area anomaly in history and future; the black line represents future burned area trend while removing the interannual variations of the dominant variable. Solid lines represented significant BA trends ( $p$  value  $< 0.05$ ) while dashed lines represented non-significant BA trends.

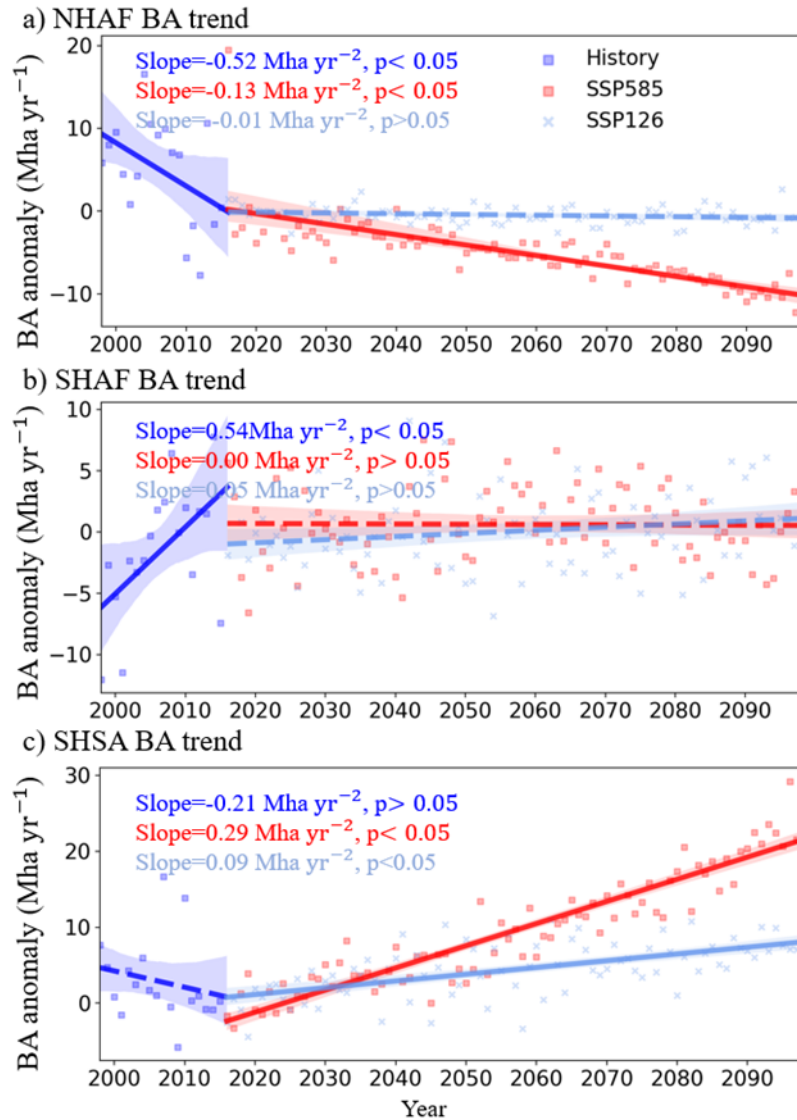

**Fig. S5.** Burned area changes in history and future. Deep blue and light blue lines represent burned area changes under SSP585 and SSP126, respectively, and red lines represent burned area changes in history. Solid lines represented significant ( $p < 0.05$ ) burned area trends while dashed lines represented non-significant trends.

#### Minor comments:

1. L69: Suggest replacing “from climate” with “of climate”

Revised as suggested.

2. L70: Suggest replacing “up to multiple” with “on the order of”

Revised as suggested.

3. L81: Suggest replacing “opposing fire” with “opposite fire”

Revised as suggested.

4. L212: Suggest adding “the” between “2016-2055” and “99<sup>th</sup>”

Revised as suggested.
